# Supplementary material
Source: MDPI journal article supplement (https://www.mdpi.com/2071-1050/12/8/3461)
Supplement: s1 [file s1]

## Supplementary material: Sample questionnaire

### Native Grasslands in your neighbourhood

#### Section 1: What do you value about natural areas in cities?

This question is about what you value about natural areas in cities-places like parks and creeks in the city that retain many of their natural features. Take a minute or so to think about natural areas like this. Regardless of whether you use these places, we would like you to indicate how important each of the following things are about natural areas in cities:

| <i>How important are each of the following things about natural areas in cities?</i> |                                                                                                 | Not important at all     |                          | Neither important nor unimportant |                          |                          | Very important           |                          |
|--------------------------------------------------------------------------------------|-------------------------------------------------------------------------------------------------|--------------------------|--------------------------|-----------------------------------|--------------------------|--------------------------|--------------------------|--------------------------|
|                                                                                      |                                                                                                 | 1                        | 2                        | 3                                 | 4                        | 5                        | 6                        | 7                        |
| 1.1                                                                                  | Experiencing nature through activities such as sight-seeing or bird watching                    | <input type="checkbox"/> | <input type="checkbox"/> | <input type="checkbox"/>          | <input type="checkbox"/> | <input type="checkbox"/> | <input type="checkbox"/> | <input type="checkbox"/> |
| 1.2                                                                                  | Motorised activities such as trail bike riding or four-wheel driving                            | <input type="checkbox"/> | <input type="checkbox"/> | <input type="checkbox"/>          | <input type="checkbox"/> | <input type="checkbox"/> | <input type="checkbox"/> | <input type="checkbox"/> |
| 1.3                                                                                  | Gathering food such as mushrooms, herbs and berries                                             | <input type="checkbox"/> | <input type="checkbox"/> | <input type="checkbox"/>          | <input type="checkbox"/> | <input type="checkbox"/> | <input type="checkbox"/> | <input type="checkbox"/> |
| 1.4                                                                                  | Getting away from the stresses of everyday life                                                 | <input type="checkbox"/> | <input type="checkbox"/> | <input type="checkbox"/>          | <input type="checkbox"/> | <input type="checkbox"/> | <input type="checkbox"/> | <input type="checkbox"/> |
| 1.5                                                                                  | Utilising the land for active recreation e.g. sports fields and courts, BMX tracks, skate parks | <input type="checkbox"/> | <input type="checkbox"/> | <input type="checkbox"/>          | <input type="checkbox"/> | <input type="checkbox"/> | <input type="checkbox"/> | <input type="checkbox"/> |
| 1.6                                                                                  | Producing food through activities such as grazing, horticulture and aquaculture                 | <input type="checkbox"/> | <input type="checkbox"/> | <input type="checkbox"/>          | <input type="checkbox"/> | <input type="checkbox"/> | <input type="checkbox"/> | <input type="checkbox"/> |
| 1.7                                                                                  | Being accessible for people                                                                     | <input type="checkbox"/> | <input type="checkbox"/> | <input type="checkbox"/>          | <input type="checkbox"/> | <input type="checkbox"/> | <input type="checkbox"/> | <input type="checkbox"/> |
| 1.8                                                                                  | A place to see historic things such as old railways, rock art or dry stone walls                | <input type="checkbox"/> | <input type="checkbox"/> | <input type="checkbox"/>          | <input type="checkbox"/> | <input type="checkbox"/> | <input type="checkbox"/> | <input type="checkbox"/> |
| 1.9                                                                                  | Spaces for people to exercise e.g. jogging, walking                                             | <input type="checkbox"/> | <input type="checkbox"/> | <input type="checkbox"/>          | <input type="checkbox"/> | <input type="checkbox"/> | <input type="checkbox"/> | <input type="checkbox"/> |
| 1.10                                                                                 | Utilising the land for new housing                                                              | <input type="checkbox"/> | <input type="checkbox"/> | <input type="checkbox"/>          | <input type="checkbox"/> | <input type="checkbox"/> | <input type="checkbox"/> | <input type="checkbox"/> |
| 1.11                                                                                 | Activities such as mountain biking or horse riding                                              | <input type="checkbox"/> | <input type="checkbox"/> | <input type="checkbox"/>          | <input type="checkbox"/> | <input type="checkbox"/> | <input type="checkbox"/> | <input type="checkbox"/> |
| 1.12                                                                                 | Healthy land and waterways in which natural processes can continue                              | <input type="checkbox"/> | <input type="checkbox"/> | <input type="checkbox"/>          | <input type="checkbox"/> | <input type="checkbox"/> | <input type="checkbox"/> | <input type="checkbox"/> |
| 1.13                                                                                 | Spaces for people to interact and socialise                                                     | <input type="checkbox"/> | <input type="checkbox"/> | <input type="checkbox"/>          | <input type="checkbox"/> | <input type="checkbox"/> | <input type="checkbox"/> | <input type="checkbox"/> |
| 1.14                                                                                 | A place for human history and stories                                                           | <input type="checkbox"/> | <input type="checkbox"/> | <input type="checkbox"/>          | <input type="checkbox"/> | <input type="checkbox"/> | <input type="checkbox"/> | <input type="checkbox"/> |
| 1.15                                                                                 | Learning about cultural traditions                                                              | <input type="checkbox"/> | <input type="checkbox"/> | <input type="checkbox"/>          | <input type="checkbox"/> | <input type="checkbox"/> | <input type="checkbox"/> | <input type="checkbox"/> |
| 1.16                                                                                 | Utilising the land for shops, cafes and car parks                                               | <input type="checkbox"/> | <input type="checkbox"/> | <input type="checkbox"/>          | <input type="checkbox"/> | <input type="checkbox"/> | <input type="checkbox"/> | <input type="checkbox"/> |
| 1.17                                                                                 | Activities such as fishing or collecting firewood                                               | <input type="checkbox"/> | <input type="checkbox"/> | <input type="checkbox"/>          | <input type="checkbox"/> | <input type="checkbox"/> | <input type="checkbox"/> | <input type="checkbox"/> |
| 1.18                                                                                 | A place for a short walk                                                                        | <input type="checkbox"/> | <input type="checkbox"/> | <input type="checkbox"/>          | <input type="checkbox"/> | <input type="checkbox"/> | <input type="checkbox"/> | <input type="checkbox"/> |
| 1.19                                                                                 | Large old trees                                                                                 | <input type="checkbox"/> | <input type="checkbox"/> | <input type="checkbox"/>          | <input type="checkbox"/> | <input type="checkbox"/> | <input type="checkbox"/> | <input type="checkbox"/> |
| 1.20                                                                                 | Beautiful sights, sounds and smells                                                             | <input type="checkbox"/> | <input type="checkbox"/> | <input type="checkbox"/>          | <input type="checkbox"/> | <input type="checkbox"/> | <input type="checkbox"/> | <input type="checkbox"/> |
| 1.21                                                                                 | Native plants and animals                                                                       | <input type="checkbox"/> | <input type="checkbox"/> | <input type="checkbox"/>          | <input type="checkbox"/> | <input type="checkbox"/> | <input type="checkbox"/> | <input type="checkbox"/> |
| 1.22                                                                                 | A place that is safe for people to visit                                                        | <input type="checkbox"/> | <input type="checkbox"/> | <input type="checkbox"/>          | <input type="checkbox"/> | <input type="checkbox"/> | <input type="checkbox"/> | <input type="checkbox"/> |

## Section 2: The native grassland in your neighbourhood

Below is a map of the grassland in your neighbourhood: Albion Bill Carn Avenue Grassland, in Cairnlea. Take a minute or so to think about this area.

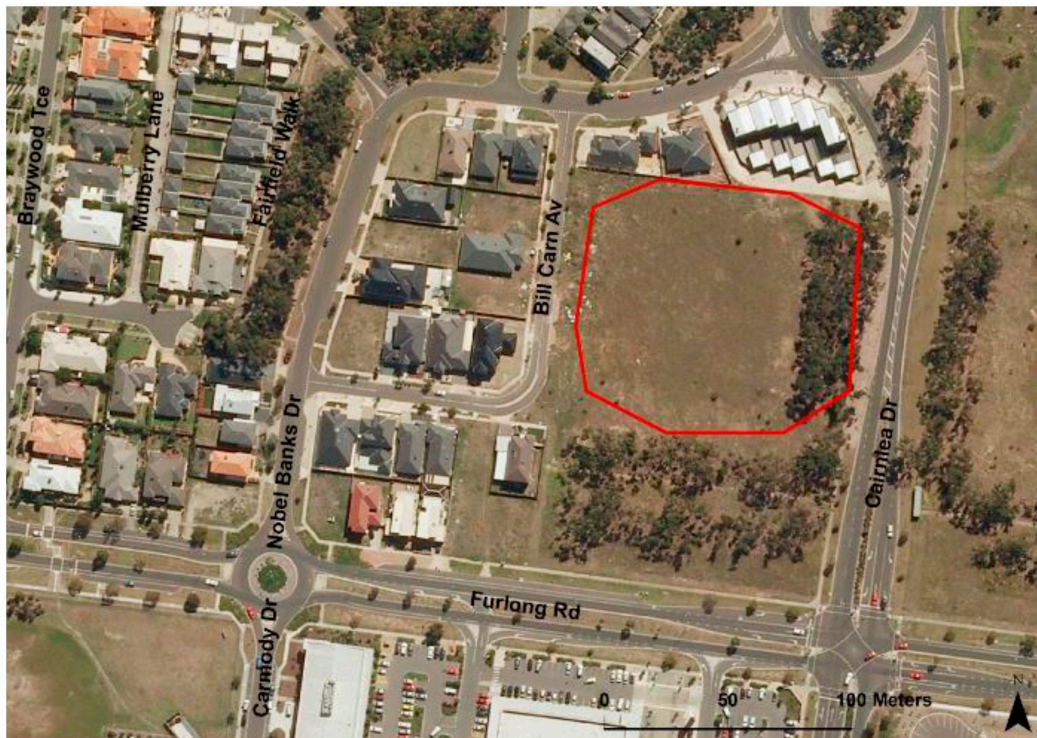

**Map 1:** Aerial photograph of Albion Bill Carn Avenue Grassland, Cairnlea.

We would now like you to answer a few questions about this area.

**2.1 Were you aware of Albion Bill Carn Avenue Grassland before today?**

Yes ☐ No ☐ (Skip to section 3) Not sure ☐ (Skip to section 3)

**2.2 Have you attended any community events associated with the grassland?**

Yes ☐ No ☐ Not sure ☐

**2.3 If yes, what was the most recent event you attended?** \_\_\_\_\_

Think for a moment about Albion Bill Carn Avenue Grassland.

When thinking about Albion Bill Carn Avenue Grassland, how much do you agree with the following statements:

|       |                                                                | Don't agree at all       |                          | Neither agree nor disagree |                          |                          | Strongly agree           |                          | I don't know             |
|-------|----------------------------------------------------------------|--------------------------|--------------------------|----------------------------|--------------------------|--------------------------|--------------------------|--------------------------|--------------------------|
|       |                                                                | 1                        | 2                        | 3                          | 4                        | 5                        | 6                        | 7                        |                          |
| 2.4.1 | Overall, I am satisfied with Albion Bill Carn Avenue Grassland | <input type="checkbox"/> | <input type="checkbox"/> | <input type="checkbox"/>   | <input type="checkbox"/> | <input type="checkbox"/> | <input type="checkbox"/> | <input type="checkbox"/> | <input type="checkbox"/> |
| 2.4.2 | I enjoy using Albion Bill Carn Avenue Grassland                | <input type="checkbox"/> | <input type="checkbox"/> | <input type="checkbox"/>   | <input type="checkbox"/> | <input type="checkbox"/> | <input type="checkbox"/> | <input type="checkbox"/> | <input type="checkbox"/> |
| 2.4.3 | Albion Bill Carn Avenue Grassland is well maintained           | <input type="checkbox"/> | <input type="checkbox"/> | <input type="checkbox"/>   | <input type="checkbox"/> | <input type="checkbox"/> | <input type="checkbox"/> | <input type="checkbox"/> | <input type="checkbox"/> |
| 2.4.4 | I feel safe when visiting Albion Bill Carn Avenue Grassland    | <input type="checkbox"/> | <input type="checkbox"/> | <input type="checkbox"/>   | <input type="checkbox"/> | <input type="checkbox"/> | <input type="checkbox"/> | <input type="checkbox"/> | <input type="checkbox"/> |
| 2.4.5 | I know the Albion Bill Carn Avenue Grassland well              | <input type="checkbox"/> | <input type="checkbox"/> | <input type="checkbox"/>   | <input type="checkbox"/> | <input type="checkbox"/> | <input type="checkbox"/> | <input type="checkbox"/> | <input type="checkbox"/> |

2.5 Do you have any other opinions about Albion Bill Carn Avenue Grassland you would like to share?

Section 3: What do you think about some of the ways used to manage grasslands?

We would like to know what you think about some of the ways used to manage grasslands in Melbourne. First, we are interested in what you think about using planned burning to manage grasslands. Take a moment to think about these practices.

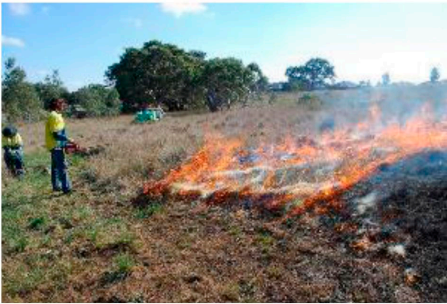

Photo 5: A planned burn at Malcolm Creek Grassland, Craigieburn.

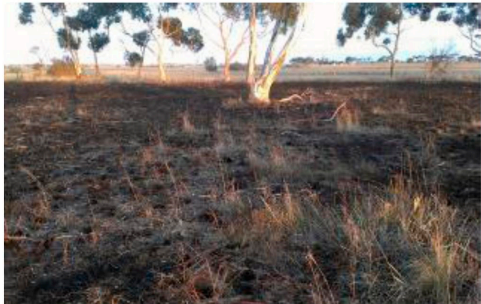

Photo 6: A few days after a planned burn at Truganina Cemetery grassland, Truganina.

We would like you to indicate how much to you agree with the following statements. Using planned burning to manage grasslands in Melbourne:

|      |                                                                        | Don't agree at all       |                          | Neither agree nor disagree |                          |                          | Strongly agree           |                          | I don't know             |
|------|------------------------------------------------------------------------|--------------------------|--------------------------|----------------------------|--------------------------|--------------------------|--------------------------|--------------------------|--------------------------|
|      |                                                                        | 1                        | 2                        | 3                          | 4                        | 5                        | 6                        | 7                        |                          |
| 3.1  | Is dangerous for people                                                | <input type="checkbox"/> | <input type="checkbox"/> | <input type="checkbox"/>   | <input type="checkbox"/> | <input type="checkbox"/> | <input type="checkbox"/> | <input type="checkbox"/> | <input type="checkbox"/> |
| 3.2  | Makes the landscape look uncared for                                   | <input type="checkbox"/> | <input type="checkbox"/> | <input type="checkbox"/>   | <input type="checkbox"/> | <input type="checkbox"/> | <input type="checkbox"/> | <input type="checkbox"/> | <input type="checkbox"/> |
| 3.3  | Is needed for the long term survival of the grassland                  | <input type="checkbox"/> | <input type="checkbox"/> | <input type="checkbox"/>   | <input type="checkbox"/> | <input type="checkbox"/> | <input type="checkbox"/> | <input type="checkbox"/> | <input type="checkbox"/> |
| 3.4  | Creates habitat for native animals, birds and insects                  | <input type="checkbox"/> | <input type="checkbox"/> | <input type="checkbox"/>   | <input type="checkbox"/> | <input type="checkbox"/> | <input type="checkbox"/> | <input type="checkbox"/> | <input type="checkbox"/> |
| 3.5  | Creates a beautiful looking landscape                                  | <input type="checkbox"/> | <input type="checkbox"/> | <input type="checkbox"/>   | <input type="checkbox"/> | <input type="checkbox"/> | <input type="checkbox"/> | <input type="checkbox"/> | <input type="checkbox"/> |
| 3.6  | Allows traditional aboriginal practices to continue                    | <input type="checkbox"/> | <input type="checkbox"/> | <input type="checkbox"/>   | <input type="checkbox"/> | <input type="checkbox"/> | <input type="checkbox"/> | <input type="checkbox"/> | <input type="checkbox"/> |
| 3.7  | Creates a good place for people to exercise                            | <input type="checkbox"/> | <input type="checkbox"/> | <input type="checkbox"/>   | <input type="checkbox"/> | <input type="checkbox"/> | <input type="checkbox"/> | <input type="checkbox"/> | <input type="checkbox"/> |
| 3.8  | Rejuvenates the grassland                                              | <input type="checkbox"/> | <input type="checkbox"/> | <input type="checkbox"/>   | <input type="checkbox"/> | <input type="checkbox"/> | <input type="checkbox"/> | <input type="checkbox"/> | <input type="checkbox"/> |
| 3.9  | Protects rare or threatened plants and animals living in the grassland | <input type="checkbox"/> | <input type="checkbox"/> | <input type="checkbox"/>   | <input type="checkbox"/> | <input type="checkbox"/> | <input type="checkbox"/> | <input type="checkbox"/> | <input type="checkbox"/> |
| 3.10 | Connects people to the heritage of the land                            | <input type="checkbox"/> | <input type="checkbox"/> | <input type="checkbox"/>   | <input type="checkbox"/> | <input type="checkbox"/> | <input type="checkbox"/> | <input type="checkbox"/> | <input type="checkbox"/> |
| 3.11 | Is good for people's health                                            | <input type="checkbox"/> | <input type="checkbox"/> | <input type="checkbox"/>   | <input type="checkbox"/> | <input type="checkbox"/> | <input type="checkbox"/> | <input type="checkbox"/> | <input type="checkbox"/> |
| 3.12 | Creates a good place for people to meet and socialise                  | <input type="checkbox"/> | <input type="checkbox"/> | <input type="checkbox"/>   | <input type="checkbox"/> | <input type="checkbox"/> | <input type="checkbox"/> | <input type="checkbox"/> | <input type="checkbox"/> |

Do you have any other comments about using planned burning to manage grasslands in Melbourne?

---



---

We would now like to know what you think about planting or allowing trees and shrubs to grow in grasslands. Take a moment to think about these management practices.

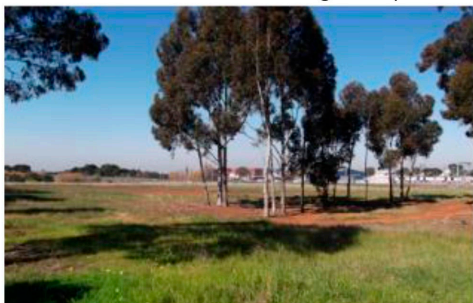

**Photo 1:** A group of trees in O'Brian Park grassland, Sunshine.

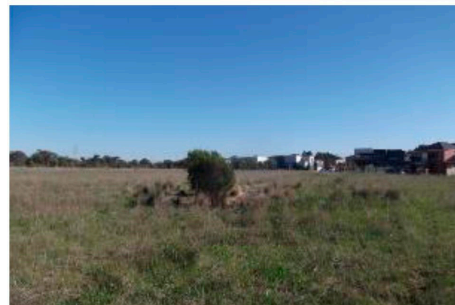

**Photo 2:** A shrub in Central Creek Grassland, Reservoir.

We would like you to indicate how much to you agree with the following statements. Planting or allowing trees and shrubs to grow in grasslands in Melbourne:

|                                                                             | Don't agree at all       |                          | Neither agree nor disagree |                          |                          | Strongly agree           |                          | I don't know             |
|-----------------------------------------------------------------------------|--------------------------|--------------------------|----------------------------|--------------------------|--------------------------|--------------------------|--------------------------|--------------------------|
|                                                                             | 1                        | 2                        | 3                          | 4                        | 5                        | 6                        | 7                        |                          |
| 3.13 Protects rare or threatened plants and animals living in the grassland | <input type="checkbox"/> | <input type="checkbox"/> | <input type="checkbox"/>   | <input type="checkbox"/> | <input type="checkbox"/> | <input type="checkbox"/> | <input type="checkbox"/> | <input type="checkbox"/> |
| 3.14 Creates a good place for people to exercise                            | <input type="checkbox"/> | <input type="checkbox"/> | <input type="checkbox"/>   | <input type="checkbox"/> | <input type="checkbox"/> | <input type="checkbox"/> | <input type="checkbox"/> | <input type="checkbox"/> |
| 3.15 Makes the landscape look uncared for                                   | <input type="checkbox"/> | <input type="checkbox"/> | <input type="checkbox"/>   | <input type="checkbox"/> | <input type="checkbox"/> | <input type="checkbox"/> | <input type="checkbox"/> | <input type="checkbox"/> |
| 3.16 Is dangerous for people                                                | <input type="checkbox"/> | <input type="checkbox"/> | <input type="checkbox"/>   | <input type="checkbox"/> | <input type="checkbox"/> | <input type="checkbox"/> | <input type="checkbox"/> | <input type="checkbox"/> |
| 3.17 Creates a good place for people to meet and socialise                  | <input type="checkbox"/> | <input type="checkbox"/> | <input type="checkbox"/>   | <input type="checkbox"/> | <input type="checkbox"/> | <input type="checkbox"/> | <input type="checkbox"/> | <input type="checkbox"/> |
| 3.18 Rejuvenates the grassland                                              | <input type="checkbox"/> | <input type="checkbox"/> | <input type="checkbox"/>   | <input type="checkbox"/> | <input type="checkbox"/> | <input type="checkbox"/> | <input type="checkbox"/> | <input type="checkbox"/> |
| 3.19 Is needed for the long term survival of the grassland                  | <input type="checkbox"/> | <input type="checkbox"/> | <input type="checkbox"/>   | <input type="checkbox"/> | <input type="checkbox"/> | <input type="checkbox"/> | <input type="checkbox"/> | <input type="checkbox"/> |
| 3.20 Creates habitat for native animals, birds and insects                  | <input type="checkbox"/> | <input type="checkbox"/> | <input type="checkbox"/>   | <input type="checkbox"/> | <input type="checkbox"/> | <input type="checkbox"/> | <input type="checkbox"/> | <input type="checkbox"/> |
| 3.21 Connects people to the heritage of the land                            | <input type="checkbox"/> | <input type="checkbox"/> | <input type="checkbox"/>   | <input type="checkbox"/> | <input type="checkbox"/> | <input type="checkbox"/> | <input type="checkbox"/> | <input type="checkbox"/> |
| 3.22 Creates a beautiful looking landscape                                  | <input type="checkbox"/> | <input type="checkbox"/> | <input type="checkbox"/>   | <input type="checkbox"/> | <input type="checkbox"/> | <input type="checkbox"/> | <input type="checkbox"/> | <input type="checkbox"/> |
| 3.23 Is good for people's health                                            | <input type="checkbox"/> | <input type="checkbox"/> | <input type="checkbox"/>   | <input type="checkbox"/> | <input type="checkbox"/> | <input type="checkbox"/> | <input type="checkbox"/> | <input type="checkbox"/> |
| 3.24 Allows traditional aboriginal practices to continue                    | <input type="checkbox"/> | <input type="checkbox"/> | <input type="checkbox"/>   | <input type="checkbox"/> | <input type="checkbox"/> | <input type="checkbox"/> | <input type="checkbox"/> | <input type="checkbox"/> |

Do you have any other comments about planting or allowing trees and shrubs to grow in grasslands in Melbourne?

---



---

How acceptable do you think these management practices are for grasslands in Melbourne?

|                                                         | Not acceptable           |                          | Neither acceptable nor unacceptable |                          |                          | Very acceptable          |                          | I don't know             |
|---------------------------------------------------------|--------------------------|--------------------------|-------------------------------------|--------------------------|--------------------------|--------------------------|--------------------------|--------------------------|
|                                                         | 1                        | 2                        | 3                                   | 4                        | 5                        | 6                        | 7                        |                          |
| 3.25 Using planned burning to manage the grass          | <input type="checkbox"/> | <input type="checkbox"/> | <input type="checkbox"/>            | <input type="checkbox"/> | <input type="checkbox"/> | <input type="checkbox"/> | <input type="checkbox"/> | <input type="checkbox"/> |
| 3.26 Allowing trees and shrubs to grow in the grassland | <input type="checkbox"/> | <input type="checkbox"/> | <input type="checkbox"/>            | <input type="checkbox"/> | <input type="checkbox"/> | <input type="checkbox"/> | <input type="checkbox"/> | <input type="checkbox"/> |
| 3.27 Removing trees and shrubs from the grassland       | <input type="checkbox"/> | <input type="checkbox"/> | <input type="checkbox"/>            | <input type="checkbox"/> | <input type="checkbox"/> | <input type="checkbox"/> | <input type="checkbox"/> | <input type="checkbox"/> |



## Section 4: Some questions about you

### 4.1 Gender: *please tick.*

☐ Female ☐ Male

### 4.2 Age: *please tick the most correct.*

- ☐ 18-24
- ☐ 25-34
- ☐ 35-44
- ☐ 45-54
- ☐ 55-64
- ☐ 64-74
- ☐ 75-84
- ☐ 85+

### 4.3 Highest level of education attained: *please tick the most correct.*

- ☐ Year 10 or below
- ☐ Year 11
- ☐ Year 12
- ☐ VET Certificate I/II
- ☐ VET Certificate III/IV
- ☐ Diploma/ Advance Diploma
- ☐ Bachelor Degree
- ☐ Graduate Diploma/ Certificate
- ☐ Postgraduate degree

### 4.4 Do you speak a language other than English at home?

☐ Yes ☐ No If yes, which language(s): \_\_\_\_\_

### 4.5 Are you a member of a community group associated with grasslands?

☐ Yes ☐ No ☐ Not sure

If yes, which group are you a member with? \_\_\_\_\_

### 4.6 Are you now, or have you previously worked in nature conservation, landscape design, planning or management in a professional role?

☐ Yes ☐ No ☐ Not sure

If yes, what is/ was your role? \_\_\_\_\_

*This is the end of the questionnaire.  
Thank you for your participation*

**Figure S1.** Sample Questionnaire: Native Grasslands in your neighborhood.
